# Supplementary material for: SIV infection duration largely determines broadening of neutralizing antibody response in macaques
Source: JCI journal article supplement (doi:10.1172/jci139123), 2020-07-14
Supplement: sd1 [file 1]

## 1 **Supplementary Figures and Tables**

2

3 **Supplementary Figure 1: Development of neutralizing antibodies against heterologous**  
4 **viruses.** (a) IC50 titers of sera from SIVsmE660-FL14 (Tier 1A) infected macaques against  
5 SIVsmE543-3. (b) IC50 titers of sera from H807-16w-6 (Tier 2) infected macaques against  
6 SIVsmE543-3. (c) IC50 titers of sera from H807-24w-4 (Tier 3) infected macaques against  
7 SIVsmE543-3. (d) IC50 titers of sera from SIVsmE660-FL14 (Tier 1A) infected macaques against  
8 SIVmac239. (e) IC50 titers of sera from H807-16w-6 (Tier 2) infected macaques against  
9 SIVmac239. (f) IC50 titers of sera from H807-24w-4 (Tier 3) infected macaques against  
10 SIVmac239.

11

12 **Supplementary Figure 2: Different sequence divergence rates of viral Env in macaques**  
13 **infected with the three clones.** Viral Env sequences in each macaque at sequential time points  
14 post infection were sequenced by Illumina MiSeq deep sequencing. Sequences were split into  
15 20 non-overlapping but contiguous loci composed of 40 codons based on the read length.  
16 Sequence divergence in each macaque at specific time points was calculated by aligning the  
17 NGS reads against the inoculum sequences. Divergence rates were calculated by applying  
18 smoothed spline regressions with divergence and sample week acting as the response and  
19 predictor, respectively. (A) Total rates of sequence divergence at the most divergent regions  
20 of Env over all times sampled. (B) Divergence rates of selected regions of Env at early,  
21 intermediate and late points of infection.

22

23 **Supplementary Figure 3: Longitudinal Env divergence based on non-synonymous mutations.**  
24 Sequences were split into 20 non-overlapping but contiguous loci composed of 40 codons  
25 based on the read length. Sequence divergence in each macaque at specific time points was  
26 calculated by aligning the NGS reads against the inoculum sequences. The divergence rate at  
27 Env regions C1 (34-73), V1 (113-154), V2 (154-194), V4 (405-440) and gp41 tail (801-840) are  
28 shown.

29

30 **Supplementary Figure 4: Longitudinal Env diversity based on non-synonymous mutations.**  
31 Sequence diversity (the average hamming distance between haplotypes) in each macaque at  
32 specific time points at Env regions C1 (34-73), V1 (113-154), V2 (154-194), V4 (405-440) and  
33 gp41 tail (801-840) are shown.

34

35

36 **Supplementary Table 1. Neutralization sensitivity screen of SIVsmE660 clones**

37

38 **Supplementary Table 2. MHC genotype and gender of macaques**

39

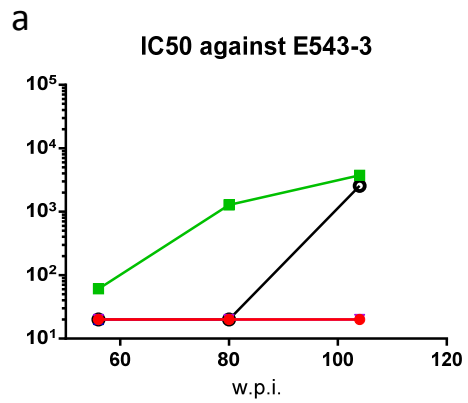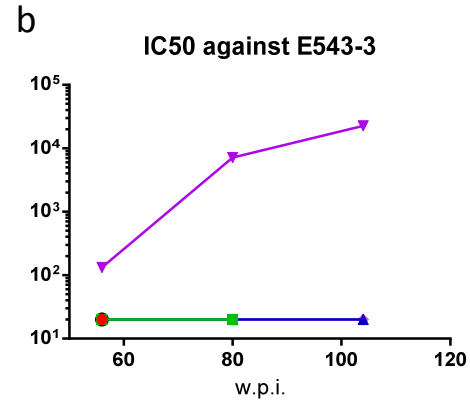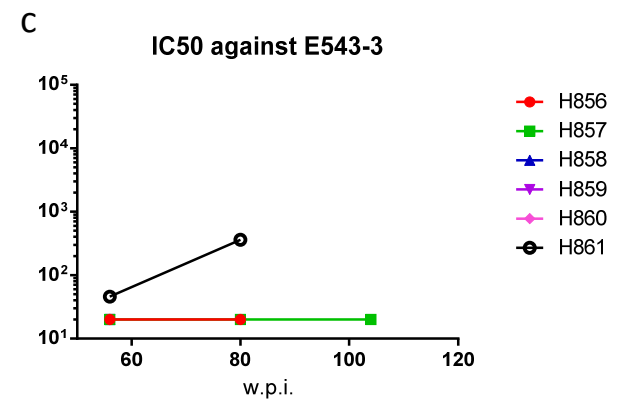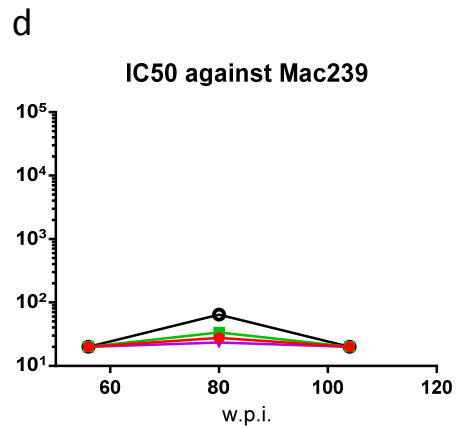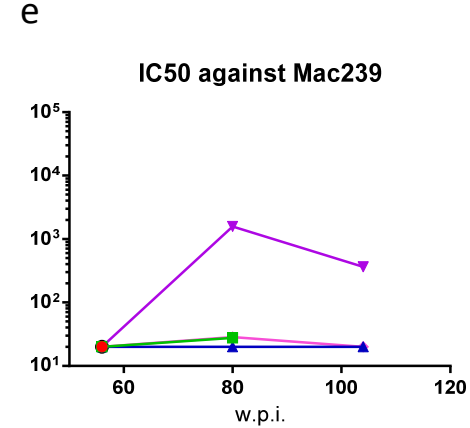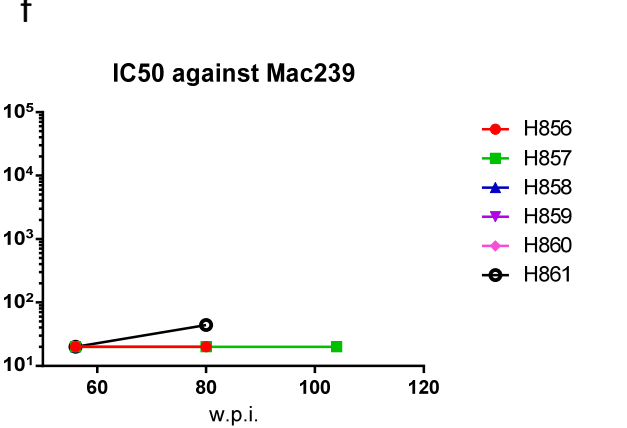

Supplementary Fig. 1

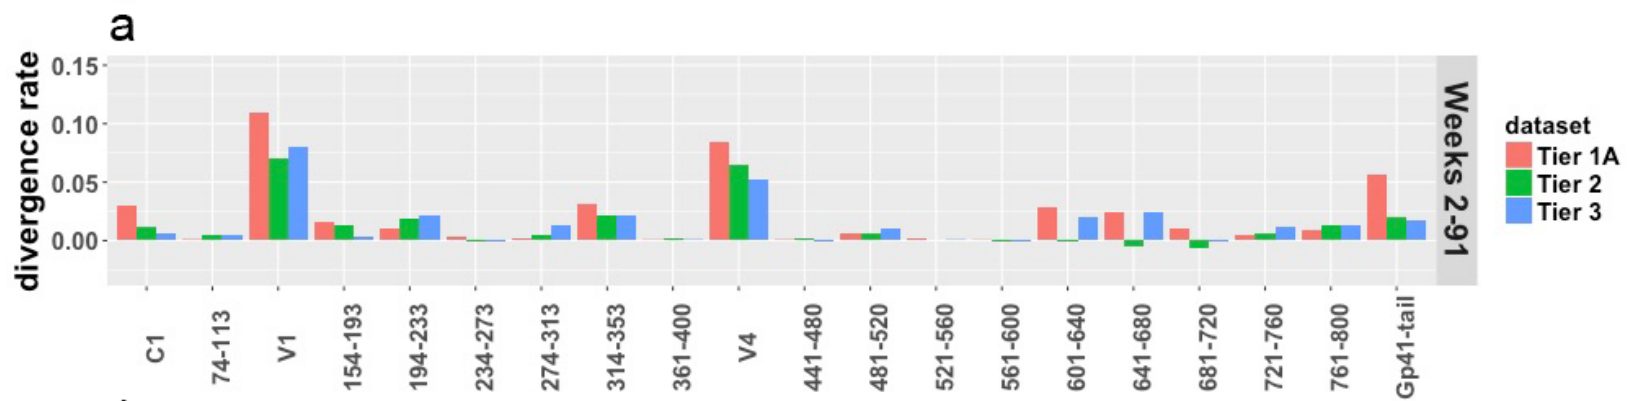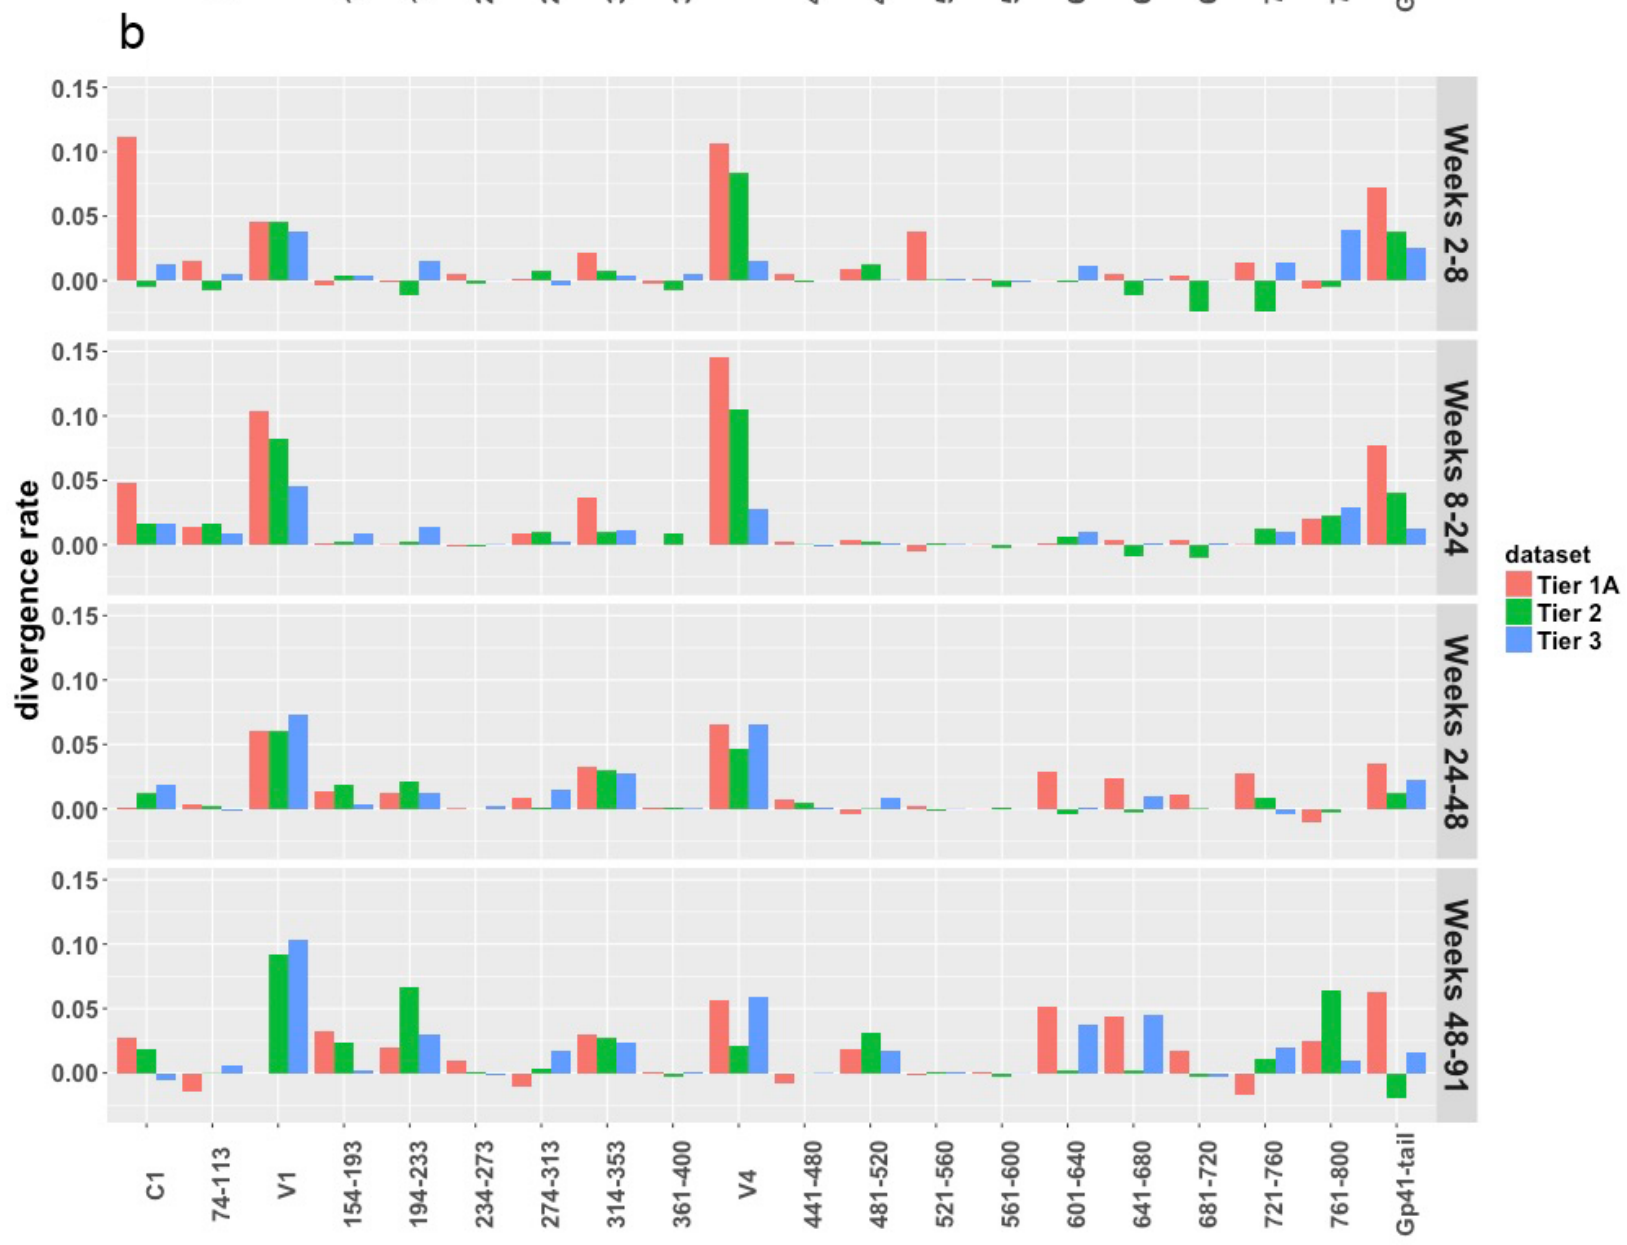

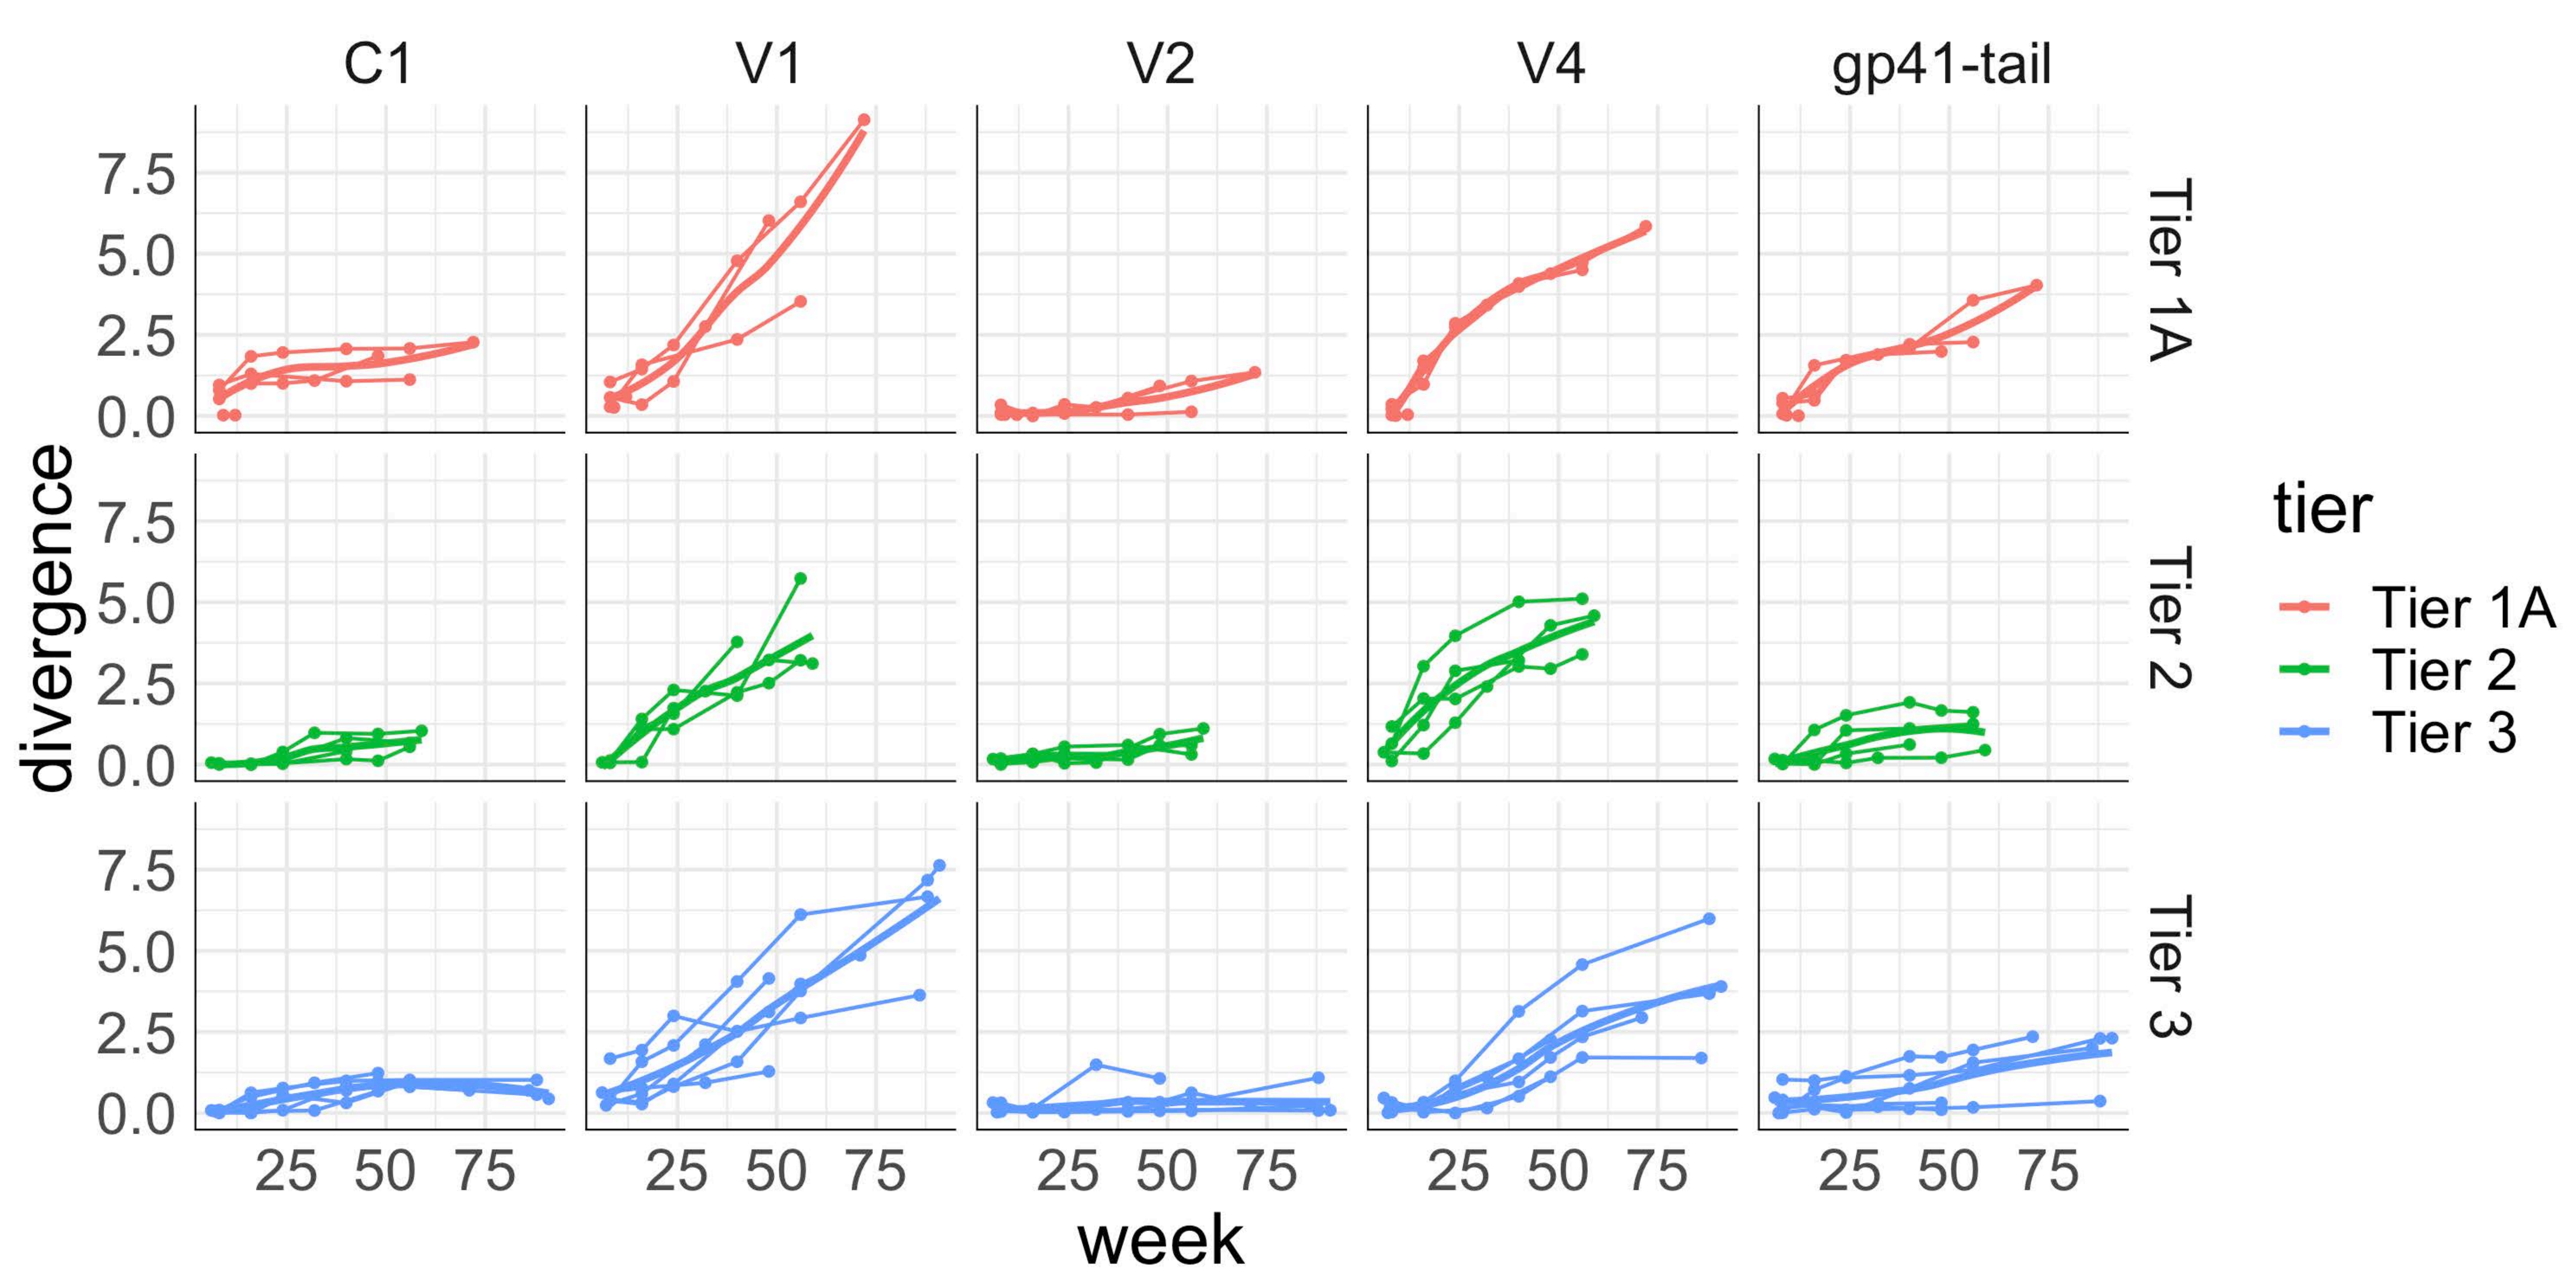

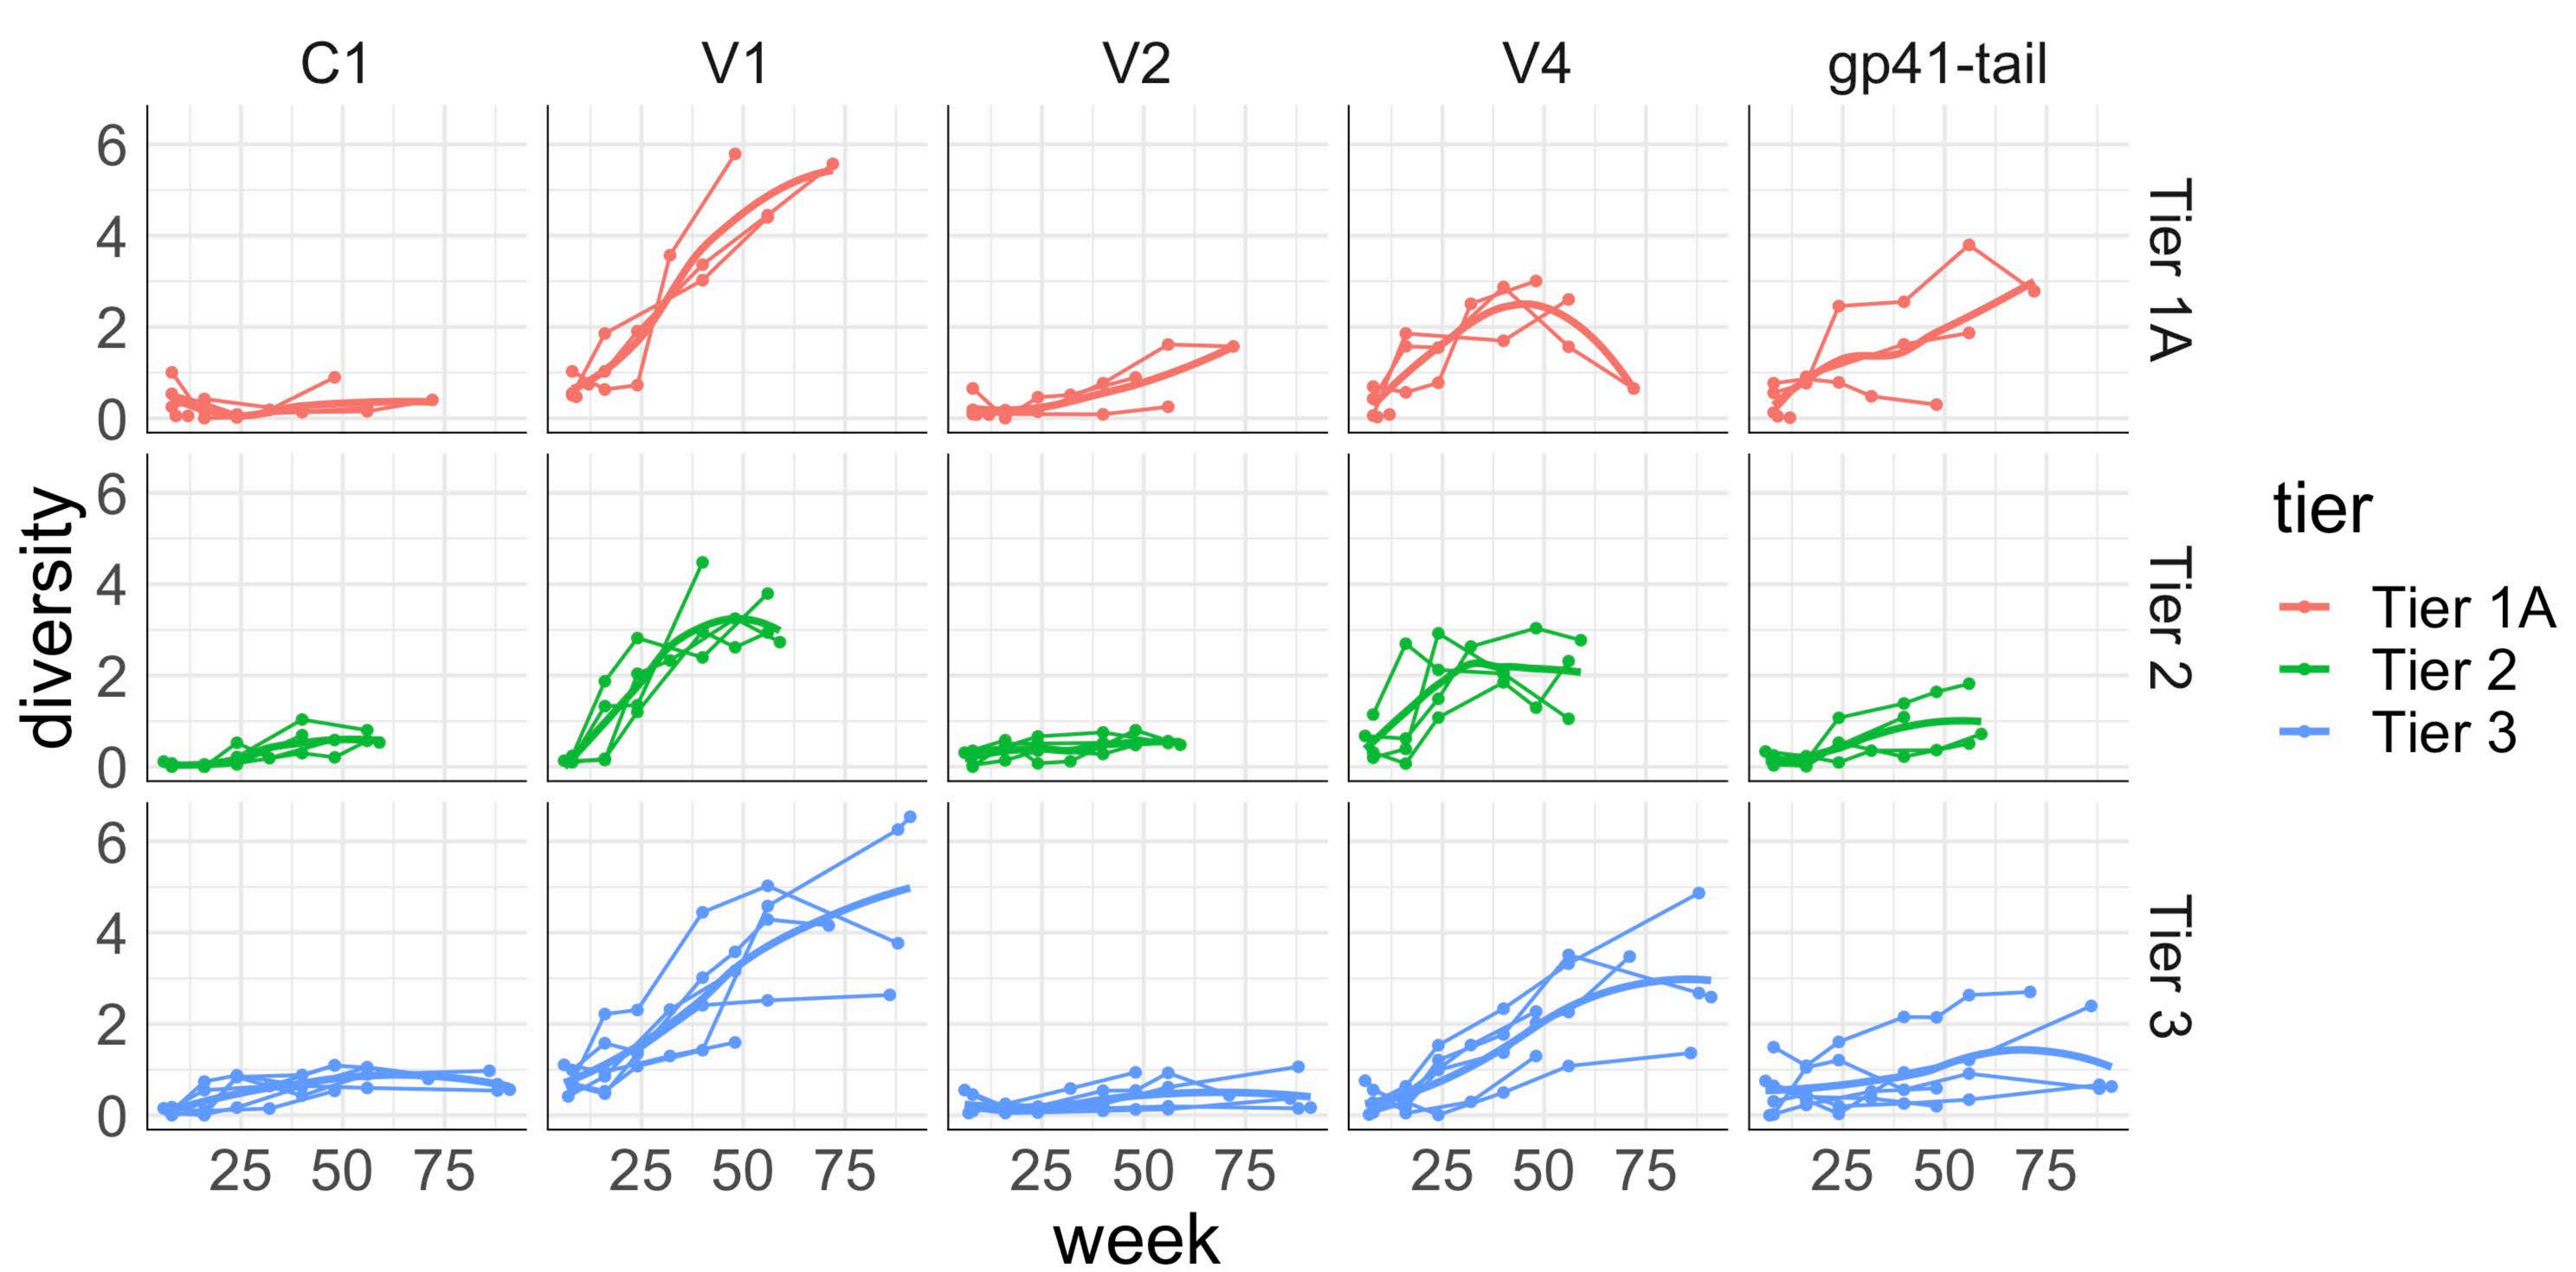

**Supplementary Table S1. Neutralization sensitivity screen of SIVsmE660 clones**

| Viruses:                   | GenBank       | SIVsmE660 infected RM |          |          |          |          | SIVmac251<br>infected RM | SIVsmm G932<br>infected RM | SIVagm<br>infected AGM |
|----------------------------|---------------|-----------------------|----------|----------|----------|----------|--------------------------|----------------------------|------------------------|
|                            |               | Rh422                 | RhB1     | RhB2     | RhB4     | RhB5     | pool sera                | pool sera                  | pool sera              |
| SIVsmE660-FL6/H805.16w.8   | JQ864119      | >43740                | >43740   | >43740   | >43740   | >43740   | >43740                   | >43740                     | >43740                 |
| SIVsmE660-FL6/H806.24w.2   | JQ864135      | >43740                | >43740   | >43740   | >43740   | >43740   | >43740                   | >43740                     | 206                    |
| SIVsmE660-FL6/H806.24w.5   | JQ864132      | >43740                | >43740   | >43740   | >43740   | >43740   | >43740                   | >43740                     | 202                    |
| SIVsmE660-FL14/H807.4w.6   | JQ864148      | >43740                | >43740   | >43740   | >43740   | >43740   | >43740                   | >43740                     | 2935                   |
| SIVsmE660-FL14/H807.16w.9  | JQ864163      | >43740                | >43740   | >43740   | >43740   | >43740   | >43740                   | >43740                     | 1960                   |
| SIVsmE660-FL14/H808.24w.5  | JQ864175      | >43740                | >43740   | >43740   | >43740   | >43740   | >43740                   | >43740                     | 1743                   |
| SIVsmE660/BR-CG7G.IR1      | JX648292      | 365716                | >2343750 | >2343750 | >2343750 | >2343750 | >2343750                 | >2343750                   | 3200                   |
| SIVmac251.6                | Not available | 513727                | 741907   | 453567   | 319258   | 623600   | 610                      | 86                         | 467                    |
| SIVsmE660-FL6/H805.24w.2   | JQ864123      | >43740                | >43740   | >43740   | >43740   | >43740   | 45                       | 63                         | 93                     |
| SIVsmE660-300-16           | KC595653      | >43740                | >43740   | >43740   | >43740   | >43740   | 20                       | 27                         | 49                     |
| SIVsmE660/CR54-PK-2A5      | FJ578939      | >43740                | >43740   | >43740   | >43740   | >43740   | 76                       | 273                        | 1933                   |
| SIVsmE660/BR-CG7V.IR1      | JX648291      | >43740                | >43740   | >43740   | >43740   | >43740   | 106                      | 136                        | 168                    |
| SIVsmE660-FL6/H806.24w.3   | JQ864138      | >43740                | >43740   | >43740   | >43740   | >43740   | 52                       | <20                        | <20                    |
| SIVsmE660-FL14/H807.24w.5  | JQ864169      | >43740                | >43740   | >43740   | >43740   | >43740   | 54                       | 49                         | 75                     |
| SIVsmE660-FL6/H805.16w.5   | JQ864117      | >43740                | >43740   | >43740   | >43740   | >43740   | 33                       | <20                        | <20                    |
| SIVsmE660-FL14/H807.16w.6  | JQ864161      | 22                    | 13190    | >43740   | >43740   | >43740   | 22                       | 33                         | 42                     |
| SIVsmE660-FL6/H805.24w.3   | JQ864124      | <20                   | 114      | >43740   | >43740   | >43740   | 62                       | >43740                     | >43740                 |
| SIVsmE660-FL14/H807.8w.7   | JQ864153      | <20                   | 50       | >43740   | >43740   | >43740   | 23                       | 38                         | 96                     |
| SIVsmE660-FL14/H807.16w.3  | JQ864158      | <20                   | 37       | 1140     | 93       | >43740   | <20                      | <20                        | 24                     |
| SIVsmE660-FL14/H808.24w.1  | JQ864176      | <20                   | <20      | >43740   | >43740   | >43740   | 79                       | 88                         | 114                    |
| SIVsmE660-FL6/H805.24w.8   | JQ864129      | 34                    | 30       | 863      | 47       | 817      | <20                      | <20                        | <20                    |
| SIVsmE660-FL14/H807.24w.4  | JQ864168      | <20                   | <20      | 283      | 48       | 377      | <20                      | <20                        | <20                    |
| SIVsmE660-FL14/H807.24w.7  | JQ864170      | <20                   | <20      | 399      | 81       | 6080     | 25                       | 22                         | 44                     |
| SIVsmE660-FL14/H808.24w.10 | JQ864180      | 27                    | 33       | 1997     | 51       | 1018     | 20                       | <20                        | 35                     |

**Supplementary Table S2. MHC genotype and gender of macaques**

| <b>Inoculation</b>          | <b>Animal ID</b> | <b>MHC</b> | <b>M/F</b> |
|-----------------------------|------------------|------------|------------|
| <b>SIVsmE660-FL14</b>       | Rh844            | -          | M          |
| <b>Tier 1A</b>              | Rh845            | A02,B01    | M          |
|                             | Rh846            | A02        | M          |
|                             | Rh847            | <b>B08</b> | M          |
|                             | Rh848            | B01        | M          |
|                             | Rh849            | -          | F          |
| <b>SIVsmE660/H807-16w-6</b> | Rh850            | -          | M          |
| <b>Tier 2</b>               | Rh851            | A02,B01    | M          |
|                             | Rh852            | B01        | M          |
|                             | Rh853            | A02        | M          |
|                             | Rh854            | -          | F          |
|                             | Rh855            | A02        | F          |
| <b>SIVsmE660/H807-24w-4</b> | Rh856            | -          | M          |
| <b>Tier 3</b>               | Rh857            | A02        | M          |
|                             | Rh858            | B01        | M          |
|                             | Rh859            | A08        | M          |
|                             | Rh860            | A02,B01    | F          |
|                             | Rh861            | <b>A01</b> | F          |
